# Supplementary figures and images for: Territoires intercommunaux et aires d'influence urbaine : Mise en place, fonctionnement et effets de l'intercommunalité : l'exemple des villes d'Angers, du Mans et de Tours
Source: Oxford University Press journal article supplement (doi:10.1242/jeb.130559), 2008-01-01

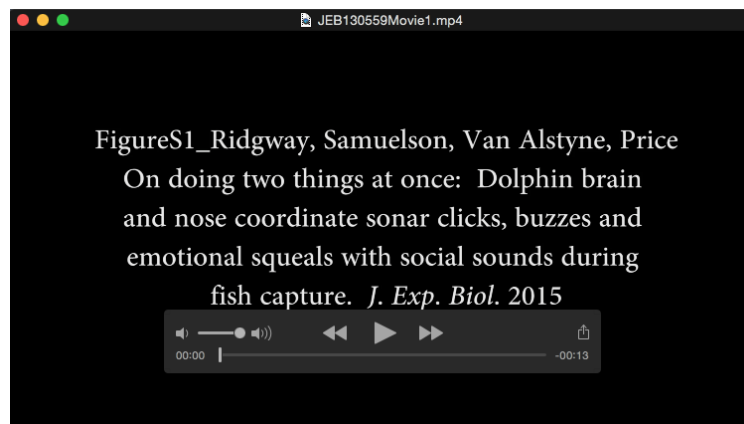

**Movie 1.** Video of fish capture with sound.

Supplement: jeb130559supp.pdf [file jeb130559supp.pdf]
